RESEARCH ARTICLE

# Circulating sex hormone binding globulin: An integrating biomarker for an adverse cardio-metabolic profile in obese pregnant women

Sílvia Xargay-Torrent<sup>1</sup>, Gemma Carreras-Badosa<sup>1</sup>, Sara Borrat-Padrosa<sup>2</sup>, Anna Prats-Puig<sup>3</sup>, Pilar Soriano<sup>4</sup>, Elena Álvarez-Castaño<sup>5</sup>, M<sup>a</sup> Jose Ferri<sup>6</sup>, Francis De Zegher<sup>7</sup>, Lourdes Ibáñez<sup>8,9</sup>, Abel López-Bermejo<sup>1,2</sup>\*, Judit Bassols<sup>10</sup>\*

**1** Obesity and cardiovascular risk in pediatrics, [Girona Biomedical Research Institute] IDIBGI, Salt, Spain, **2** Department of Pediatrics, Dr. Trueta University Hospital, Girona, Spain, **3** Department of Physical Therapy, EUSES University School, Salt, Spain, **4** Clinical Laboratory, Fundació Salut Empordà, Figueres, Spain, **5** Department of Gynecology, Dr. Trueta University Hospital, Girona, Spain, **6** Clinical Laboratory, Dr. Trueta University Hospital, Girona, Spain, **7** Department of Development & Regeneration, University of Leuven, Leuven, Belgium, **8** Endocrinology, Hospital Sant Joan de Déu, University of Barcelona, Barcelona, Spain, **9** Centro de Investigación Biomédica en Red de Diabetes y Enfermedades Metabólicas Asociadas (CIBERDEM), ISCIII, Madrid, Spain, **10** Materno-fetal metabolic reseach, [Girona Biomedical Research Institute] IDIBGI, Salt, Spain

\* These authors contributed equally to this work.

\* [jbassols@idibgi.org](mailto:jbassols@idibgi.org) (JB); [alopezbermejo@idibgi.org](mailto:alopezbermejo@idibgi.org) (ALB)

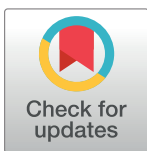

**OPEN ACCESS**

**Citation:** Xargay-Torrent S, Carreras-Badosa G, Borrat-Padrosa S, Prats-Puig A, Soriano P, Álvarez-Castaño E, et al. (2018) Circulating sex hormone binding globulin: An integrating biomarker for an adverse cardio-metabolic profile in obese pregnant women. *PLoS ONE* 13(10): e0205592. <https://doi.org/10.1371/journal.pone.0205592>

**Editor:** Zhong-Cheng Luo, Mount Sinai Health System, University of Toronto, CANADA

**Received:** March 8, 2018

**Accepted:** September 27, 2018

**Published:** October 15, 2018

**Copyright:** © 2018 Xargay-Torrent et al. This is an open access article distributed under the terms of the [Creative Commons Attribution License](https://creativecommons.org/licenses/by/4.0/), which permits unrestricted use, distribution, and reproduction in any medium, provided the original author and source are credited.

**Data Availability Statement:** All relevant data are within the paper and its Supporting Information files.

**Funding:** This work was supported by Ministerio de Ciencia e Innovación, Instituto de Salud Carlos III (<http://www.isciii.es>), Madrid, Spain (grant numbers PI14/01625 to JB and PI16/01335 to ALB), projects co-funded by FEDER (Fondo Europeo de Desarrollo Regional). The funder had no role in

## Abstract

Sex hormone-binding globulin (SHBG) negatively associates with pre-gestational body mass index (BMI) and gestational weight gain. The link with other cardio-metabolic risk factors in pregnant women is poorly understood. Our aim was to study the association of SHBG levels with common cardio-metabolic risk parameters in pregnant woman.

Serum SHBG was quantified in 291 Caucasian pregnant women (142 with normal weight, 42 with pregestational obesity, 50 with gestational obesity and 57 with pregestational plus gestational obesity) with uncomplicated pregnancies and parturition. Cardio-metabolic [C-reactive protein (CRP), blood pressure (BP), glycosylated hemoglobin (HbA1c), glucose, C-peptide, insulin, triglycerides and high molecular weight (HMW) adiponectin], and endocrine [testosterone and estradiol] parameters were also assessed.

SHBG was negatively correlated with BMI, but also with CRP, BP, HbA1c, pre and post-load glucose, C-peptide, HOMA-IR, triglycerides; and positively with HMW adiponectin (all  $p < 0.01$  to  $p < 0.0001$ ). These associations were more robust in women with pregestational plus gestational obesity, who had lower SHBG, in comparison to normal-weight women ( $p < 0.0001$ ). In multivariate analyses in women with pregestational plus gestational obesity SHBG showed independent associations with CRP ( $\beta = -0.352$ ,  $p = 0.03$ ,  $R^2 = 8.0\%$ ), DBP ( $\beta = -0.353$ ,  $p = 0.03$ ,  $R^2 = 7.0\%$ ) and SBP ( $\beta = -0.333$ ,  $p = 0.04$ ,  $R^2 = 6.0\%$ ) independently of BMI and metabolic and endocrine parameters.

SHBG is decreased in pregnant women with pregestational plus gestational obesity in association with common cardio-metabolic parameters. SHBG could represent an integrating biomarker for an adverse cardio-metabolic profile in pregnant women with pregestational plus gestational obesity.

study design, data collection and analysis, decision to publish, or preparation of the manuscript.

**Competing interests:** The authors have declared that no competing interests exist.

## Introduction

Obesity is a well-known worldwide epidemic condition that affects men, women and children. In recent years, much attention has been paid to obesity during pregnancy, which has not only adverse effects on the mothers' health but also on the developing fetus [1]. Pregnant women with obesity have increased risk of impaired glucose tolerance and gestational diabetes (GDM) and increased risk of delivering a large for gestational age baby [1]. Offspring of obese women have also increased risk of obesity and obesity-related negative health outcomes later in life, such as increased carotid-intima thickness, higher body mass index, increased blood pressure or adverse lipid profile throughout childhood, adolescence, and as young adults [2,3]. Women can enter pregnancy with a body mass index (BMI) in the overweight or obese range or gain excessive weight during gestation and it is difficult to determine the separate or interdependent contributions of prepregnancy BMI and gestational weight gain on the metabolic outcomes for the mother and the offspring [4].

Adiposity is significantly associated with sex hormones, and adipose tissue contributes to the production of sex hormones in women [5,6]. Increased concentrations of sexual steroids have been related to cardio-metabolic alterations such as high blood pressure, gestational diabetes mellitus, pre-eclampsia or low/high birth weight [5,7–10]. Sex hormone binding globulin (SHBG) is a glycoprotein synthesized by the liver that transports sexual steroids (androgens and estrogens) in plasma, regulating their availability and access to target organs [11]. SHBG production is negatively regulated by insulin and monosaccharides and numerous studies in men, children and adolescents have shown that SHBG levels are reduced in obesity, insulin resistance, metabolic syndrome and type 2 diabetes [12,13]. Thus, a low level of SHBG may be a biomarker for the future development of metabolic risk factors (including hypertension, dyslipidemia, abdominal obesity and impaired glucose metabolism), and has been associated with a 2-fold increased risk of cardiovascular disease (CVD) [14]. Consistently, in postmenopausal women, low SHBG levels are related to an adverse profile of risk factors for CVD [15].

SHBG levels vary during pregnancy, being higher between 16 and 27 weeks' gestation. The hormone is expressed in placenta as well as found in cord blood. SHBG is reduced in pregnant women with obesity and gestational diabetes [16,17]. The relationship between newborn parameters such as birth weight and maternal SHBG concentrations has been poorly investigated and is controversial, with some studies finding negative correlations and others no association [18–20]. Recent data suggest that SHBG levels during pregnancy may contribute to and predict the development of adiposity, metabolic syndrome and diabetes as children grow older [21]. If confirmed, SHBG might be a useful biomarker to detect children who are prone to develop cardio-metabolic diseases.

In summary, the link of SHBG with common cardio-metabolic parameters is poorly understood in pregnancy. We aimed to study the association of circulating SHBG with cardio-metabolic parameters in a cohort of pregnant women with pregestational and/or gestational obesity. As a secondary aim, we also studied the relationship of maternal SHBG with newborn parameters.

## Materials and methods

### Study population and ethics

The study cohort consisted of 291 mother-newborn pairs recruited among those seen at the prenatal primary care clinics in Girona, between 2008 and 2010. Inclusion criteria were: 1) singleton uncomplicated pregnancies of Caucasian origin; 2) absence of major medical, surgical or obstetrical complications; and 3) absence of maternal pathology (hypertension, pre-

eclampsia or gestational diabetes). The exclusion criteria were: 1) fetal malformations or asphyxia; and 2) lack of data about principal variables. A total of 335 pregnant women were recruited in the prenatal cohort and 43 were excluded because they did not fulfil the inclusion criteria or had exclusion criteria.

Women were grouped according to their pregestational BMI and their end pregnancy weight gain following consensus guidelines from the Health and Medicine Division of the US National Academies [22], which are recommended by Spanish Society of Gynecology and Obstetrics (SEGO). The groups were as follows: 1) Normal weight women: [ $18.5 \leq$ pregestational BMI  $\leq 24.9$  and  $11.5 \leq$ pregnancy weight gain  $\leq 16$ kg]; 2) Women with Pregestational obesity only [pregestational BMI  $\geq 25$  and  $7 \leq$ pregnancy weight gain  $\leq 11.5$ kg or pregestational BMI  $> 30$  and  $5 \leq$ pregnancy weight gain  $\leq 9$ kg]; 3) Women with gestational obesity only [ $18.5 \leq$ pregestational BMI  $\leq 24.9$  and pregnancy weight gain  $> 16$ kg]; and 4) Pregestational plus Gestational obesity [pregestational BMI  $\geq 25$  and pregnancy weight gain  $> 16$ kg or pregestational BMI  $\geq 30$  and pregnancy weight gain  $> 9$ kg] respectively.

The protocol was approved by the Institutional Review Board of Dr. Josep Trueta Hospital and all methods were performed in accordance with the relevant guidelines and regulations. Written informed consent was obtained from the women. All data generated or analyzed during this study are included in this published article.

### Assessments and samples

Prenatal follow-up, consisting of standardized clinical exams, ultrasonograms, and laboratory tests (urine and blood), were performed in all subjects. Social, demographic, medical and reproductive features were retrieved from the mothers' clinical records along with labor and delivery information. Maternal education was assessed as years of schooling after primary school.

Maternal weight and height were assessed at the beginning of gestation, at second trimester and again before delivery. Maternal gestational weight gain was obtained as the difference between the last weight measurement before delivery and pre-pregnancy weight. Body mass index (BMI) was calculated as weight divided by height squared,  $\text{Kg/m}^2$ . Systolic (SBP) and diastolic (DBP) blood pressure were measured in the sitting position on the right arm after 10 min rest; an electronic sphygmomanometer (Dinamap Pro 100, GE Healthcare, Chalfont St. Giles, United Kingdom) was used.

At delivery, placentas were weighed using a calibrated scale. Infants were weighed and measured within the first minutes after delivery using a calibrated scale for weight, a measuring board and a measuring tape for length and head circumference respectively. Gestational age- and sex-adjusted z-scores were calculated using regional norms [23]. Ponderal index was calculated as  $(\text{birth weight (g)} * 100) / (\text{birthlength (cm)})^3$ .

### Analytical methods

All serum samples for assessment of soluble SHBG and metabolic markers were obtained under fasting conditions at second trimester of pregnancy (between 24 and 28 gestation weeks), at the time of assessment of glucose tolerance. Oral glucose tolerance tests, with fasting and one hour-timed blood glucose measurements after a 50 g oral glucose load, were performed in all participants.

Serum glucose was analyzed by the hexokinase method. HbA1c was measured by high performance liquid chromatography with ionic exchange (D-10 Hemoglobin, Bio-Rad Laboratories, Hercules, CA). Serum immunoreactive insulin was measured by immunochemiluminiscence (IMMULITE 2000, Diagnostic Products, Los Angeles, CA). Lower detection limit

was 0.4 mIU/L and intra- and inter-assay CVs were less than 10%. Fasting insulin sensitivity was estimated from fasting insulin and glucose levels using the homeostasis model assessment [HOMA-IR = (fasting insulin in mU/l) x (fasting glucose in mM)/22.5]. Serum C-peptide was measured by immunochemiluminiscence (IMMULITE 2000; Diagnostic Products, Los Angeles, CA). The detection limit was 0.05 ng/mL and CVs were less than 10%. High-molecular-weight (HMW) adiponectin was measured by sandwich ELISA (Linco, St. Charles, MO). The detection limit was 0.5 ng/mL and CVs was less than 4%. Serum levels of CRP were measured using an ultrasensitive latex immunoassay (CRP Vario; Sentinel Diagnostics, Abbott Diagnostics Europe, Milan, Italy). The lower limit of detection was 0.2 mg/L, and the intra-assay and interassay CVs were both <3%. Total serum triglycerides were measured by monitoring the reaction of glycerol-phosphate-oxidase and peroxidase. HDL cholesterol was quantified by the homogeneous method of selective detergent with accelerator. Serum alanine aminotransferase (ALT), aspartate aminotransferase (AST) and gamma-glutamyltransferase (GGT) were analyzed by colorimetry using automated tests (Roche diagnostics GmbH, Mannheim, Germany). Intraassay and interassay coefficients of variation were less than 4% for these tests. Serum SHBG, estradiol and testosterone concentrations were measured by a chemiluminescent microparticle immunoassay (ARCHITECT, Abbot Laboratories SA, Texas). The within- and between-run CVs were less than 10%, and the detection limit were 0.1 nmol/L, 5 pg/mL and 0.15 nmol/L, respectively. Total testosterone was used to calculate free testosterone as previously described [24].

## Statistics

Statistical analyses were performed using SPSS version 18.0 (SPSS Inc, Chicago, IL). Results are expressed as mean  $\pm$  SD for normally distributed variables and median and interquartile range for non-normally distributed variables. Kolmogorov-Smirnov test was applied to test for normal distribution. Non-normally distributed variables were mathematically transformed to improve symmetry. Differences among pregnant women groups were examined by One-way ANOVA and DMS post-hoc test or  $\chi^2$  test. The relation of SHBG with maternal cardio-metabolic parameters at the second trimester of pregnancy (24–28 weeks of gestation) was analyzed by Pearson correlation followed by multiple regression analysis using the enter method to adjust for maternal age, maternal education, pregestational and gestational smoking, BMI, time of gestation, HOMA-IR, HMW adiponectin, hepatic enzymes, serum lipids and sex hormones. The same tests were used to study the association between SHBG at the second trimester of pregnancy and newborn parameters. Significance level was set at  $p < 0.05$ .

## Results

Clinical and laboratory characteristics of the study subjects are summarized in [Table 1](#). Women with pregestational, gestational obesity or pregestational plus gestational obesity showed lower SHBG values than normal weight women ( $p = 0.05$ ,  $p = 0.05$  and  $p < 0.001$  respectively; [Table 1](#)).

In the studied women, decreasing concentrations of SHBG were correlated with a less favorable cardio-metabolic profile (more CRP, DBP, SBP, BMI, HbA<sub>1c</sub>, pre and post-load glucose, C-peptide, HOMA-IR, triglycerides and less HMW adiponectin; all  $p < 0.05$  to  $p < 0.001$ ; [Table 2](#)). Most of these associations were not apparent in normal weight women or women with pregestational or gestational obesity only but were present in women with pregestational plus gestational obesity ([Table 2](#)).

The associations of SHBG with cardio-metabolic parameters remained significant in all subjects after controlling for maternal age and education, BMI, time of gestation, smoking,

**Table 1. Clinical and laboratory assessments in the studied pregnant women.**

|                                                                        | All subjects<br>(n = 291) | Normal weight<br>(n = 142) | Pregestational<br>obesity<br>(n = 42) | Gestational obesity<br>(n = 50) | Pregestational + gestational obesity<br>(n = 57) |
|------------------------------------------------------------------------|---------------------------|----------------------------|---------------------------------------|---------------------------------|--------------------------------------------------|
| <b>Maternal Clinical assessments</b>                                   |                           |                            |                                       |                                 |                                                  |
| Pregestational weight (Kg)                                             | 64.4 ± 12.3               | 57.5 ± 6.0                 | 78.0 ± 12.4 <sup>a</sup>              | 58.8 ± 6.3 <sup>b</sup>         | 76.3 ± 11.0 <sup>a</sup>                         |
| Pregestational BMI (kg/m <sup>2</sup> )                                | 24.2 ± 4.5                | 21.7 ± 1.9                 | 29.5 ± 4.7 <sup>a</sup>               | 21.7 ± 1.8 <sup>b</sup>         | 28.8 ± 3.7 <sup>a</sup>                          |
| Gestational weight gain (kg)                                           | 13.4 ± 5.5                | 11.9 ± 3.1                 | 6.7 ± 2.9 <sup>ab</sup>               | 20.3 ± 4.5 <sup>ab</sup>        | 16.0 ± 4.5 <sup>a</sup>                          |
| Gestational age at delivery (wk)                                       | 40 ± 1                    | 39 ± 1                     | 40 ± 1                                | 40 ± 1 <sup>a</sup>             | 40 ± 1 <sup>a</sup>                              |
| Pregestational smoking (% yes)                                         | 31                        | 28                         | 36                                    | 36                              | 34                                               |
| Gestational smoking (% yes)                                            | 23                        | 22                         | 29                                    | 21                              | 23                                               |
| Maternal education (yr)                                                | 4 ± 3                     | 4 ± 3                      | 4 ± 3                                 | 4 ± 3                           | 4 ± 3                                            |
| <b>Maternal Clinical assessments at second trimester of pregnancy:</b> |                           |                            |                                       |                                 |                                                  |
| Age (yr)                                                               | 30 ± 5                    | 30 ± 5                     | 31 ± 5                                | 30 ± 5                          | 31 ± 5                                           |
| Height(cm)                                                             | 163 ± 6                   | 163 ± 5                    | 161 ± 6                               | 165 ± 8 <sup>ab</sup>           | 162 ± 6                                          |
| Weight(Kg)                                                             | 71.4 ± 12.0               | 64.1 ± 6.5                 | 81.4 ± 11.6 <sup>a</sup>              | 69.4 ± 7.3 <sup>ab</sup>        | 84.0 ± 10.8 <sup>a</sup>                         |
| BMI (Kg/m <sup>2</sup> )                                               | 26.8 ± 4.3                | 24.2 ± 2.2                 | 30.6 ± 4.4 <sup>a</sup>               | 25.6 ± 2.2 <sup>ab</sup>        | 31.6 ± 3.5 <sup>a</sup>                          |
| SBP (mm Hg)                                                            | 116 ± 10                  | 115 ± 10                   | 118 ± 10                              | 116 ± 10 <sup>b</sup>           | 121 ± 10 <sup>a</sup>                            |
| DBP (mm Hg)                                                            | 68 ± 8                    | 66 ± 8                     | 70 ± 8 <sup>a</sup>                   | 70 ± 9 <sup>a</sup>             | 73 ± 8 <sup>a</sup>                              |
| Time of gestation (wk)                                                 | 26 ± 1                    | 26 ± 1                     | 26 ± 3                                | 26 ± 2                          | 26 ± 2                                           |
| <b>Maternal Laboratory variables at second trimester of pregnancy:</b> |                           |                            |                                       |                                 |                                                  |
| Pre-load glucose (mg/dL)                                               | 79 (75–84)                | 78 (73–82)                 | 81 (77–88) <sup>a</sup>               | 77 (75–83)                      | 80 (75–85) <sup>a</sup>                          |
| Post-load glucose (mg/dL)                                              | 121 (97–143)              | 118 (97–136)               | 129 (99–167) <sup>a</sup>             | 110 (86–141)                    | 125 (105–143)                                    |
| HbA1C (%)                                                              | 5.0 (4.8–5.2)             | 4.9 (4.7–5.2)              | 5.0 (4.8–5.3)                         | 5.0 (4.7–5.1)                   | 5.0 (4.8–5.3)                                    |
| Fasting insulin (μIU/mL)                                               | 6.6 (1.9–8.2)             | 2.8 (1.1–5.7)              | 5.7 (3.8–12.2) <sup>a</sup>           | 4.7 (2.3–7.4) <sup>a</sup>      | 6.8 (3.6–10.5) <sup>a</sup>                      |
| HOMA-IR                                                                | 1.3 (0.4–1.5)             | 0.5 (0.2–1.1)              | 1.2 (0.7–2.6) <sup>a</sup>            | 0.9 (0.4–1.4) <sup>a</sup>      | 1.3 (0.7–2.2) <sup>a</sup>                       |
| C-peptide (ng/mL)                                                      | 1.5 (1.3–2.1)             | 1.4 (1.1–1.7)              | 2.0 (1.5–2.8) <sup>a</sup>            | 1.6 (1.2–2.0) <sup>b</sup>      | 2.0 (1.5–2.6) <sup>a</sup>                       |
| HMW-adiponectin (mg/L)                                                 | 6.0 (3.7–7.7)             | 5.9 (4.2–8.9)              | 4.5 (3.4–5.5) <sup>a</sup>            | 5.9 (4.2–9.2) <sup>b</sup>      | 4.1 (3.2–6.1) <sup>a</sup>                       |
| CRP (mg/L)                                                             | 0.5 (0.2–0.7)             | 0.3 (0.2–0.5)              | 0.6 (0.3–0.9) <sup>a</sup>            | 0.3 (0.2–0.5) <sup>b</sup>      | 0.6 (0.4–1.1) <sup>a</sup>                       |
| Triacylglycerol (mg/dL)                                                | 159 (116–192)             | 142 (116–181)              | 170 (121–204)                         | 143 (101–190)                   | 161 (131–201)                                    |
| HDL cholesterol (mg/dL)                                                | 72 (63–81)                | 71 (63–81)                 | 71 (59–78)                            | 74 (64–85)                      | 70 (63–80)                                       |
| SHBG (nmol/L)                                                          | 570 (463–662)             | 611 (490–698)              | 550 (440–629) <sup>ab</sup>           | 538 (466–662) <sup>ab</sup>     | 478 (386–566) <sup>a</sup>                       |
| AST (U/L)                                                              | 14 (11–18)                | 14 (10–17)                 | 14 (11–17)                            | 15 (12–19)                      | 14 (11–19) <sup>a</sup>                          |
| ALT (U/L)                                                              | 15 (12–18)                | 14 (12–18)                 | 14 (11–17)                            | 15 (13–18)                      | 15 (11–19)                                       |
| GGT (U/L)                                                              | 8 (7–11)                  | 8 (7–11)                   | 8 (7–11) <sup>b</sup>                 | 8 (7–10) <sup>b</sup>           | 11 (7–16) <sup>a</sup>                           |
| Estradiol (pg/mL)                                                      | 13884 (11034–16618)       | 14426 (11865–17270)        | 12770 (9691–15993)                    | 13704 (9860–16735)              | 12292 (10445–15203) <sup>a</sup>                 |
| Free Testosterone (pg/mL)                                              | 0.04 (0.03–0.06)          | 0.03 (0.04–0.05)           | 0.04 (0.04–0.05) <sup>b</sup>         | 0.04 (0.03–0.06) <sup>b</sup>   | 0.07 (0.03–0.09) <sup>a</sup>                    |
| <b>Newborn Clinical assessments at birth:</b>                          |                           |                            |                                       |                                 |                                                  |
| Placental weight (g)                                                   | 606 ± 123                 | 568 ± 102                  | 658 ± 134 <sup>a</sup>                | 644 ± 152 <sup>a</sup>          | 629 ± 118 <sup>a</sup>                           |
| Weight (g)                                                             | 3295 ± 453                | 3157 ± 378                 | 3338 ± 445 <sup>ab</sup>              | 3411 ± 497 <sup>a</sup>         | 3523 ± 482 <sup>a</sup>                          |
| Weight SDS                                                             | 0.05 ± 1.04               | -0.21 ± 0.83               | 0.09 ± 1.1                            | 0.29 ± 1.18 <sup>a</sup>        | 0.48 ± 1.2 <sup>a</sup>                          |
| Length (cm)                                                            | 49.4 ± 2.0                | 48.9 ± 1.9                 | 49.4 ± 2.3                            | 50.0 ± 2.1 <sup>a</sup>         | 49.9 ± 2.1 <sup>a</sup>                          |
| Length SDS                                                             | -0.23 ± 1.16              | -0.39 ± 1.01               | -0.33 ± 1.40                          | 0.09 ± 1.16 <sup>a</sup>        | -0.06 ± 1.27                                     |
| Head circumference (cm)                                                | 34 ± 1                    | 33 ± 1                     | 34 ± 1 <sup>b</sup>                   | 34 ± 2 <sup>a</sup>             | 34 ± 2 <sup>a</sup>                              |
| Head circumference SDS                                                 | -0.86 ± 1.46              | -1.17 ± 1.36               | -0.92 ± 1.20                          | -0.48 ± 1.64 <sup>a</sup>       | -0.34 ± 1.54 <sup>a</sup>                        |

(Continued)

Table 1. (Continued)

|                                     | All subjects<br>(n = 291) | Normal weight<br>(n = 142) | Pregestational<br>obesity<br>(n = 42) | Gestational obesity<br>(n = 50) | Pregestational + gestational obesity<br>(n = 57) |
|-------------------------------------|---------------------------|----------------------------|---------------------------------------|---------------------------------|--------------------------------------------------|
| Ponderal index (g/cm <sup>3</sup> ) | 1.3 ± 0.1                 | 1.3 ± 0.1                  | 1.4 ± 0.2 <sup>a</sup>                | 1.4 ± 0.1 <sup>ab</sup>         | 1.4 ± 0.1 <sup>a</sup>                           |

Mean ± SD or median (interquartile range). BMI: body mass index; SBP/DBP: systolic/diastolic blood pressure; HOMA-IR: homeostasis model assessment insulin resistance; CRP: C-reactive protein; SHBG: Sex hormone-binding globulin. DMS post-hoc analysis

<sup>a</sup>p<0.05 vs normal

<sup>b</sup>p<0.05 pregestational or gestational obesity vs pregestational plus gestational obesity.

<https://doi.org/10.1371/journal.pone.0205592.t001>

metabolic (HOMA-IR, hepatic enzymes and serum lipids) and endocrine parameters (HMW adiponectin, free testosterone and estradiol) in multiple regression analyses. CRP ( $\beta = -0.151$ ,  $p = 0.009$ ) and DBP ( $\beta = -0.129$ ,  $p = 0.024$ ) were independent predictors of SHBG levels in their respective models, explaining, together with BMI, GGT and sex hormones, 25% of SHBG variance (Table 3). In women with pregestational plus gestational obesity, SHBG showed independent associations with CRP ( $\beta = -0.352$ ,  $p = 0.032$ ,  $R^2 = 8.0\%$ ), DBP ( $\beta = -0.353$ ,  $p = 0.035$ ,  $R^2 = 7.0\%$ ) and SBP ( $\beta = -0.333$ ,  $p = 0.046$ ,  $R^2 = 6.0\%$ ) independently of BMI and metabolic and endocrine parameters (Table 3).

SHBG levels showed negative associations with newborn parameters including placental weight, birth weight, birth length, head circumference and ponderal index (all  $p < 0.05$ ; Table 2). In pregnant women with pregestational plus gestational obesity, maternal SHBG levels correlated with birth weight SDS and birth length SDS ( $p < 0.05$ ; Table 2). However, these parameters were not significantly related to SHBG in multivariate analysis after adjusting for confounding variables (Data not shown).

## Discussion

SHBG levels are decreased in pregnant women with pregestational plus gestational obesity and are correlated with a less favorable cardio-metabolic profile (more CRP, DBP, SBP, insulin, C-peptide, HOMA-IR and less HMW adiponectin).

It is well known that SHBG levels decrease with increasing obesity [25] and rise with weight loss [26]. We also observed that women with pregestational obesity and/or gestational obesity showed lower SHBG values than normal weight women.

As expected from the current literature [1,11,27] negative associations were found between SHBG levels and metabolic parameters. Except for BMI, these correlations were not apparent in normal weight women but were present in women with pregestational plus gestational obesity suggesting that the insulin resistance state secondary to maternal obesity could elicit these associations. Interestingly, it appears that the combined contribution of pregestational plus gestational obesity increases the cardio-metabolic risk in pregnant women, since each factor alone elicits weak or absent associations.

Several studies have investigated the associations between SHBG and cardiovascular risk parameters including CRP and blood pressure [28]. However, these studies were mostly performed in men [29–31]. Studies on the association between androgens and CVD in women have been conducted mainly in the setting of polycystic ovarian syndrome, a condition that has been strongly associated with cardiovascular risk factors including obesity, insulin resistance, and lipid abnormalities [32]. The available studies of SHBG in pregnant women were focused in GDM [33–37]. Interestingly, low SHBG concentrations before pregnancy have also been associated with increased risk of GDM, suggesting that SHBG could be used as a

Table 2. Pearson correlation analyses of SHBG with clinical and laboratory parameters in the studied pregnant women.

| SHBG                        | All subjects (n = 291) |        | Normal weight (n = 142) |        | Pregestational obesity (n = 42) |       | Gestational obesity (n = 50) |       | Pregestational + gestational obesity (n = 57) |        |
|-----------------------------|------------------------|--------|-------------------------|--------|---------------------------------|-------|------------------------------|-------|-----------------------------------------------|--------|
|                             | r                      | P      | r                       | P      | r                               | P     | r                            | P     | r                                             | P      |
| Maternal assessments        |                        |        |                         |        |                                 |       |                              |       |                                               |        |
| Pregestational weight       | -0.301                 | <0.001 | -0.155                  | Ns     | -0.358                          | 0.020 | -0.171                       | Ns    | -0.022                                        | Ns     |
| Pregestational BMI          | -0.311                 | <0.001 | -0.231                  | 0.006  | -0.256                          | Ns    | -0.029                       | Ns    | -0.150                                        | Ns     |
| Gestational weight gain     | -0.098                 | Ns     | 0.055                   | Ns     | -0.074                          | Ns    | -0.054                       | Ns    | 0.092                                         | Ns     |
| Gestational age at delivery | -0.023                 | Ns     | -0.003                  | Ns     | 0.061                           | Ns    | 0.052                        | Ns    | 0.321                                         | 0.018  |
| BMI                         | -0.359                 | <0.001 | -0.250                  | 0.004  | -0.226                          | Ns    | 0.004                        | Ns    | -0.191                                        | Ns     |
| SBP                         | -0.175                 | 0.005  | -0.089                  | Ns     | -0.055                          | Ns    | -0.037                       | Ns    | -0.419                                        | 0.003  |
| DBP                         | -0.238                 | <0.001 | -0.165                  | Ns     | -0.065                          | Ns    | 0.004                        | Ns    | -0.459                                        | 0.001  |
| Pre-load glucose            | -0.192                 | 0.001  | -0.082                  | Ns     | -0.374                          | 0.015 | -0.468                       | Ns    | -0.071                                        | Ns     |
| Post-load glucose           | -0.156                 | 0.008  | -0.094                  | Ns     | -0.039                          | Ns    | -0.294                       | 0.040 | -0.098                                        | Ns     |
| HbA1C                       | -0.123                 | 0.03   | 0.026                   | Ns     | -0.343                          | 0.026 | 0.012                        | Ns    | -0.262                                        | 0.049  |
| Fasting insulin             | -0.192                 | 0.001  | -0.017                  | Ns     | -0.229                          | Ns    | -0.141                       | Ns    | -0.304                                        | 0.021  |
| HOMA-IR                     | -0.201                 | 0.001  | -0.022                  | Ns     | -0.254                          | Ns    | -0.149                       | Ns    | -0.295                                        | 0.026  |
| C-peptide                   | -0.325                 | <0.001 | -0.144                  | Ns     | -0.226                          | Ns    | -0.364                       | 0.010 | -0.432                                        | 0.001  |
| HMW-adiponectin             | 0.192                  | 0.001  | 0.146                   | Ns     | 0.107                           | Ns    | 0.091                        | Ns    | 0.159                                         | Ns     |
| CRP                         | -0.288                 | <0.001 | -0.149                  | Ns     | -0.004                          | Ns    | -0.080                       | Ns    | -0.328                                        | 0.013  |
| Triacylglycerol             | -0.127                 | 0.03   | -0.124                  | Ns     | 0.146                           | Ns    | -0.204                       | Ns    | -0.111                                        | Ns     |
| HDL cholesterol             | 0.002                  | Ns     | -0.001                  | Ns     | -0.051                          | Ns    | 0.172                        | Ns    | -0.146                                        | Ns     |
| AST                         | 0.037                  | Ns     | 0.080                   | Ns     | 0.038                           | Ns    | 0.360                        | 0.010 | -0.067                                        | Ns     |
| ALT                         | -0.001                 | Ns     | 0.012                   | Ns     | -0.141                          | Ns    | 0.355                        | 0.011 | -0.063                                        | Ns     |
| GGT                         | -0.264                 | <0.001 | -0.252                  | 0.003  | -0.250                          | Ns    | 0.010                        | Ns    | -0.238                                        | Ns     |
| Estradiol                   | 0.203                  | 0.01   | 0.156                   | Ns     | 0.217                           | Ns    | 0.080                        | Ns    | 0.095                                         | Ns     |
| Free testosterone           | -0.479                 | <0.001 | -0.368                  | <0.001 | -0.419                          | Ns    | -0.541                       | 0.008 | -0.412                                        | 0.019  |
| Newborn assessments         |                        |        |                         |        |                                 |       |                              |       |                                               |        |
| Placental weight            | -0.125                 | 0.02   | 0.099                   | Ns     | 0.217                           | Ns    | -0.133                       | Ns    | 0.155                                         | Ns     |
| Weight                      | -0.120                 | 0.03   | -0.101                  | Ns     | 0.028                           | Ns    | -0.112                       | Ns    | 0.394                                         | 0.003  |
| Weight SDS                  | -0.077                 | Ns     | -0.062                  | Ns     | 0.093                           | Ns    | -0.163                       | Ns    | 0.296                                         | 0.030  |
| Length                      | -0.108                 | 0.05   | -0.089                  | Ns     | 0.065                           | Ns    | -0.170                       | Ns    | 0.479                                         | <0.001 |
| Length SDS                  | -0.021                 | Ns     | -0.053                  | Ns     | 0.109                           | Ns    | -0.251                       | Ns    | 0.389                                         | 0.004  |
| Head circumference          | -0.131                 | 0.04   | -0.044                  | Ns     | -0.070                          | Ns    | -0.066                       | Ns    | 0.129                                         | Ns     |
| Head circumference SDS      | -0.106                 | Ns     | -0.022                  | Ns     | -0.005                          | Ns    | -0.159                       | Ns    | 0.060                                         | Ns     |
| Ponderal index              | -0.128                 | 0.03   | -0.088                  | Ns     | -0.054                          | Ns    | -0.013                       | Ns    | 0.173                                         | Ns     |

<https://doi.org/10.1371/journal.pone.0205592.t002>

biomarker for early detection of GDM [38]. However, none of these studies has assessed the potential association of SHBG and cardiovascular risk markers during pregnancy. Hence we show, for the first time, that SHBG associated with CRP and BP independently of metabolic (HOMA-IR, HbA1c, hepatic enzymes and serum lipids) and endocrine (HMW adiponectin, testosterone and estradiol) parameters in pregnant women with pregestational plus gestational obesity. Although we cannot demonstrate a direct role of SHBG in real cardiovascular risk, the clinical relevance of these data relies on the independent association of SHBG with a more adverse cardio-metabolic profile. Accordingly, SHBG levels measured in young adulthood were negatively associated with markers of subclinical CVD in a cohort study of young adult women followed for 18 yr. The associations were independent of BMI and HOMA-IR. In contrast, testosterone (either total or free) levels showed no associations with SHBG [39].

Table 3. Multivariate linear models of SHBG as dependent variable in pregnant women according to obesity status.

| SHBG (nmol/L)             | All subjects (n = 291) |              |              | Normal weight (n = 142) |         |       | Pregestational obesity (n = 42) |   |      | Gestational obesity (n = 50) |   |      | Pregestational + gestational obesity (n = 57) |               |              |
|---------------------------|------------------------|--------------|--------------|-------------------------|---------|-------|---------------------------------|---|------|------------------------------|---|------|-----------------------------------------------|---------------|--------------|
|                           | Beta                   | B            | Sig.         | Beta                    | B       | Sig.  | Beta                            | B | Sig. | Beta                         | B | Sig. | Beta                                          | B             | Sig.         |
| BMI (kg/m <sup>2</sup> )  | -0.143                 | -5.0         | 0.018        | —                       | —       | —     | —                               | — | —    | —                            | — | —    | —                                             | —             | —            |
| GGT (U/L)                 | -0.187                 | -5.3         | 0.001        | -0.206                  | -6.1    | 0.017 | —                               | — | —    | —                            | — | —    | —                                             | —             | —            |
| Free Testosterone (pg/mL) | -0.266                 | -2254.1      | <0.001       | -0.275                  | -2426.0 | 0.002 | —                               | — | —    | —                            | — | —    | —                                             | —             | —            |
| CRP (mg/L)                | <b>-0.151</b>          | <b>-54.4</b> | <b>0.009</b> | —                       | —       | —     | —                               | — | —    | —                            | — | —    | <b>-0.352</b>                                 | <b>-120.0</b> | <b>0.032</b> |
| R <sup>2</sup>            |                        |              | 25%          |                         |         | 15%   |                                 |   | 0%   |                              |   | 0%   |                                               |               | 8%           |
| BMI (kg/m <sup>2</sup> )  | -0.173                 | -6.1         | 0.004        | —                       | —       | —     | —                               | — | —    | —                            | — | —    | —                                             | —             | —            |
| GGT (U/L)                 | -0.183                 | -5.2         | 0.002        | -0.201                  | -5.9    | 0.022 | —                               | — | —    | —                            | — | —    | —                                             | —             | —            |
| Free Testosterone (pg/mL) | -0.268                 | -2273.3      | <0.001       | -0.270                  | -2376.7 | 0.002 | —                               | — | —    | —                            | — | —    | —                                             | —             | —            |
| SBP (mmHg)                | —                      | —            | —            | —                       | —       | —     | —                               | — | —    | —                            | — | —    | <b>-0.333</b>                                 | <b>-4.5</b>   | <b>0.046</b> |
| R <sup>2</sup>            |                        |              | 24%          |                         |         | 14%   |                                 |   | 0%   |                              |   | 0%   |                                               |               | 6%           |
| BMI (kg/m <sup>2</sup> )  | -0.157                 | -5.5         | 0.009        | —                       | —       | —     | —                               | — | —    | —                            | — | —    | —                                             | —             | —            |
| GGT (U/L)                 | -0.186                 | -5.3         | 0.001        | -0.193                  | -5.7    | 0.026 | —                               | — | —    | —                            | — | —    | —                                             | —             | —            |
| Estradiol (pg/mL)         | 0.112                  | 0.01         | 0.041        | —                       | —       | —     | —                               | — | —    | —                            | — | —    | —                                             | —             | —            |
| Free Testosterone (pg/mL) | -0.259                 | -2190.9      | <0.001       | -0.252                  | -2225.1 | 0.004 | —                               | — | —    | —                            | — | —    | —                                             | —             | —            |
| DBP (mmHg)                | <b>-0.129</b>          | <b>-2.3</b>  | <b>0.024</b> | —                       | —       | —     | —                               | — | —    | —                            | — | —    | <b>-0.353</b>                                 | <b>-6.1</b>   | <b>0.035</b> |
| R <sup>2</sup>            |                        |              | 25%          |                         |         | 15%   |                                 |   | 0%   |                              |   | 0%   |                                               |               | 7%           |

Three separate models are shown: one for each of the studied cardiovascular parameters. R<sup>2</sup> is shown for the combined effect of the predictive variables in the model. Non-predictive variables: age, maternal educational, pregestational and gestational smoking, time at sampling during gestation (time of gestation), HOMA-IR, HMW adiponectin, AST, ALT, serum lipids.

<https://doi.org/10.1371/journal.pone.0205592.t003>

SHBG regulates the levels of active sex hormones. Sex hormones can control adipose tissue metabolism by stimulating receptors that trigger several phases of lipolysis and lipogenesis. Increased signaling by estrogens and androgens could be aimed at preparing the adipose tissue for the catabolic phase in late pregnancy in a depot-specific manner [40]. Knockout mice for estrogen receptor suffer from metabolic dysfunction together with increased adiposity, glucose intolerance, insulin resistance and endothelial alterations [41]. Although SHBG was believed to be only a transport glycoprotein, there is growing evidence suggesting that SHBG may have an independent biological function through the binding to its receptor in target tissues [42]. A possible direct effect of SHBG on diabetes mellitus was suggested by a recent report [17]. Direct effects of SHBG on the vasculature are therefore also plausible. In a study of coronary artery disease, long repeats in the *SHBG* gene promoter (the (TAAAA)n) were associated with low SHBG and with increased severity of coronary artery disease on angiography [43]. SHBG has been suggested to act through the steroid signal transduction system of cell membranes [44].

SHBG is present in the fetal circulation and in cord blood [36]. In general, low levels of SHBG have been described in newborns, followed by an increase until the end of infancy [45]. Children born at low birth weight show reduced levels of SHBG at prepubertal stages [46]. Low circulating SHBG levels in childhood and adolescence have been related to hyperinsulinaemia/insulin resistance [47]. However, the relationship between neonatal and maternal SHBG concentrations has been controversial. While no association was initially found between maternal SHBG concentrations and infant's birth weight [19,20], a recent study reported that SHBG concentrations were inversely related to birth weight [17]. Similar results were



previously obtained from SHBG measured in umbilical cord [18]. We observed that SHBG levels showed negative associations with placental weight, birth weight, birth length, head circumference and ponderal index, however, these parameters were not significantly associated with SHBG in multivariate analysis after adjusting for confounding variables. Differences in design and study populations could account for the disparity in the reported results.

An important strength of our study is the availability of a large representative population-based sample with detailed information on the cardio-metabolic profile for each individual. However, the limitations of our study also merit attention. No data about socio-economic variables of the families or physical activity of the mothers that could act as confounders was available; it would be interesting to test the contribution of these factors in future studies. The cross-sectional design does not allow us to address the temporality or cause-effect of the observed associations, thus whether elevated SHBG is causing increased cardiovascular risk or is definitely a mere consequence. In this line, future studies with long term follow-up of these women should assess whether these associations are transitory during pregnancy or permanently increase the risk of developing cardio-metabolic diseases in later life, and determine if this applies only to Caucasian population or to other ethnicities. Finally, study of the association between newborn SHBG levels at birth and maternal SHBG or maternal parameters should be considered, however not performed in this current study due to the unavailability of neonatal blood samples.

In summary, SHBG is decreased in pregnant Caucasian women with pregestational plus gestational obesity in association with common cardio-metabolic parameters. We suggest that SHBG could represent an integrating biomarker for an adverse cardio-metabolic profile in pregnant women with pregestational plus gestational obesity.

## Supporting information

**S1 Appendix. Raw data.**  
(XLSX)

## Acknowledgments

S.X-T is an investigator of the Sara Borrell Fund from Carlos III National Institute of Health, Spain (CD15-00162). FdZ is a Senior Investigator of the Clinical Research Fund of the Leuven University Hospital, Belgium. L.I. is a Clinical Investigator of CIBERDEM (Spanish Biomedical Research Centre in Diabetes and Associated Metabolic Disorders), from Carlos III National Institute of Health, Spain. A.L.-B. is an Investigator of the I3 Fund for Scientific Research (Ministry of Economy and Competitiveness, Spain). J.B. is an investigator of the Miguel Servet Fund from Carlos III National Institute of Health, Spain (MS12/03239).

## Author Contributions

**Conceptualization:** Abel López-Bermejo, Judit Bassols.

**Formal analysis:** Sílvia Xargay-Torrent, Gemma Carreras-Badosa, Sara Borrat-Padrosa, Abel López-Bermejo, Judit Bassols.

**Funding acquisition:** Abel López-Bermejo, Judit Bassols.

**Investigation:** Sílvia Xargay-Torrent, Gemma Carreras-Badosa, Sara Borrat-Padrosa, Anna Prats-Puig.

**Methodology:** Pilar Soriano, Elena Álvarez-Castaño, M<sup>a</sup> Jose Ferri.

**Supervision:** Abel López-Bermejo, Judit Bassols.

**Writing – original draft:** Judit Bassols.

**Writing – review & editing:** Sílvia Xargay-Torrent, Francis De Zegher, Lourdes Ibáñez, Abel López-Bermejo, Judit Bassols.

## References

1. Boney CM, Verma A, Tucker R, Vohr BR Metabolic syndrome in childhood: association with birth weight, maternal obesity, and gestational diabetes mellitus. *Pediatrics*. 2005; 115: e290–296. <https://doi.org/10.1542/peds.2004-1808> PMID: 15741354
2. Skilton MR, Siitonen N, Wurtz P, Viikari JS, Juonala M, Seppala I, et al. High birth weight is associated with obesity and increased carotid wall thickness in young adults: the cardiovascular risk in young Finns study. *Arterioscler Thromb Vasc Biol*. 2014; 34: 1064–1068. <https://doi.org/10.1161/ATVBAHA.113.302934> PMID: 24626439
3. Gaillard R Maternal obesity during pregnancy and cardiovascular development and disease in the offspring. *Eur J Epidemiol*. 2015; 30: 1141–1152. <https://doi.org/10.1007/s10654-015-0085-7> PMID: 26377700
4. Nicholas LM, Rattanatrav L, MacLaughlin SM, Ozanne SE, Kleemann DO, Walker SK, et al. Differential effects of maternal obesity and weight loss in the periconceptional period on the epigenetic regulation of hepatic insulin-signaling pathways in the offspring. *FASEB J*. 2013; 27: 3786–3796. <https://doi.org/10.1096/fj.13-227918> PMID: 23729590
5. Vejrazkova D, Vcelak J, Vankova M, Lukasova P, Bradnova O, Halkova T, et al. Steroids and insulin resistance in pregnancy. *J Steroid Biochem Mol Biol*. 2014; 139: 122–129. <https://doi.org/10.1016/j.jsbmb.2012.11.007> PMID: 23202146
6. Mongraw-Chaffin ML, Anderson CA, Allison MA, Ouyang P, Szklo M, Vaidya D, et al. Association between sex hormones and adiposity: qualitative differences in women and men in the multi-ethnic study of atherosclerosis. *J Clin Endocrinol Metab*. 2015; 100: E596–600. <https://doi.org/10.1210/jc.2014-2934> PMID: 25636047
7. Falbo A, Rocca M, Russo T, D’Ettore A, Tolino A, Zullo F, et al. Changes in androgens and insulin sensitivity indexes throughout pregnancy in women with polycystic ovary syndrome (PCOS): relationships with adverse outcomes. *J Ovarian Res*. 2010; 3: 23. <https://doi.org/10.1186/1757-2215-3-23> PMID: 20942923
8. Hu S, Leonard A, Seifalian A, Hardiman P Vascular dysfunction during pregnancy in women with polycystic ovary syndrome. *Hum Reprod*. 2007; 22: 1532–1539. <https://doi.org/10.1093/humrep/dem028> PMID: 17369295
9. Palomba S, de Wilde MA, Falbo A, Koster MP, La Sala GB, Fauser BC Pregnancy complications in women with polycystic ovary syndrome. *Hum Reprod Update*. 2015; 21: 575–592. <https://doi.org/10.1093/humupd/dmv029> PMID: 26117684
10. Sir-Petermann T, Maliqueo M, Angel B, Lara HE, Perez-Bravo F, Recabarren SE Maternal serum androgens in pregnant women with polycystic ovarian syndrome: possible implications in prenatal androgenization. *Hum Reprod*. 2002; 17: 2573–2579. PMID: 12351531
11. Hammond GL, Wu TS, Simard M Evolving utility of sex hormone-binding globulin measurements in clinical medicine. *Curr Opin Endocrinol Diabetes Obes*. 2012; 19: 183–189. <https://doi.org/10.1097/MED.0b013e328353732f> PMID: 22531107
12. Birkeland KI, Hanssen KF, Torjesen PA, Vaaler S Level of sex hormone-binding globulin is positively correlated with insulin sensitivity in men with type 2 diabetes. *J Clin Endocrinol Metab*. 1993; 76: 275–278. <https://doi.org/10.1210/jcem.76.2.8432768> PMID: 8432768
13. Agirbasli M, Agaoglu NB, Orak N, Caglioz H, Ocek T, Poci N, et al. Sex hormones and metabolic syndrome in children and adolescents. *Metabolism*. 2009; 58: 1256–1262. <https://doi.org/10.1016/j.metabol.2009.03.024> PMID: 19497594
14. Rexrode KM, Manson JE, Lee IM, Ridker PM, Sluss PM, Cook NR, et al. Sex hormone levels and risk of cardiovascular events in postmenopausal women. *Circulation*. 2003; 108: 1688–1693. <https://doi.org/10.1161/01.CIR.0000091114.36254.F3> PMID: 12975257
15. Jaspers L, Dhana K, Muka T, Meun C, Kiefte-de Jong JC, Hofman A, et al. Sex Steroids, Sex Hormone-Binding Globulin and Cardiovascular Health in Men and Postmenopausal Women: The Rotterdam Study. *J Clin Endocrinol Metab*. 2016; 101: 2844–2852. <https://doi.org/10.1210/jc.2016-1435> PMID: 27163357

16. Sun L, Jin Z, Teng W, Chi X, Zhang Y, Ai W, et al. SHBG in GDM maternal serum, placental tissues and umbilical cord serum expression changes and its significance. *Diabetes Res Clin Pract.* 2013; 99: 168–173. <https://doi.org/10.1016/j.diabres.2012.05.019> PMID: 23164471
17. Morisset AS, Dube MC, Drolet R, Robitaille J, Weisnagel SJ, Tchernof A Sex hormone-binding globulin levels and obesity in women with gestational diabetes: relationship with infant birthweight. *Gynecol Endocrinol.* 2011; 27: 905–909. <https://doi.org/10.3109/09513590.2011.569602> PMID: 21500993
18. Simmons D Interrelation between umbilical cord serum sex hormones, sex hormone-binding globulin, insulin-like growth factor I, and insulin in neonates from normal pregnancies and pregnancies complicated by diabetes. *J Clin Endocrinol Metab.* 1995; 80: 2217–2221. <https://doi.org/10.1210/jcem.80.7.7608282> PMID: 7608282
19. Carlsen SM, Jacobsen G, Romundstad P Maternal testosterone levels during pregnancy are associated with offspring size at birth. *Eur J Endocrinol.* 2006; 155: 365–370. <https://doi.org/10.1530/eje.1.02200> PMID: 16868152
20. Wu J, Hellerstein S, Lipworth L, Wide L, Xu B, Yu GP, et al. Correlates of pregnancy oestrogen, progesterone and sex hormone-binding globulin in the USA and China. *Eur J Cancer Prev.* 2002; 11: 283–293. PMID: 12131662
21. Dharashivkar S, Wasser L, Baumgartner RN, King JC, Winters SJ Obesity, maternal smoking and SHBG in neonates. *Diabetol Metab Syndr.* 2016; 8: 47. <https://doi.org/10.1186/s13098-016-0158-0> PMID: 27462374
22. Olson CM Achieving a healthy weight gain during pregnancy. *Annu Rev Nutr.* 2008; 28: 411–423. <https://doi.org/10.1146/annurev.nutr.28.061807.155322> PMID: 18422452
23. Carrascosa A, Fernandez JM, Fernandez C, Ferrandez A, Lopez-Siguero JP, Sanchez E, et al. Spanish growth studies 2008. New anthropometric standards. *Endocrinol Nutr.* 2008; 55: 484–506. [https://doi.org/10.1016/S1575-0922\(08\)75845-5](https://doi.org/10.1016/S1575-0922(08)75845-5) PMID: 22980464
24. Vermeulen A, Verdonck L, Kaufman JM A critical evaluation of simple methods for the estimation of free testosterone in serum. *J Clin Endocrinol Metab.* 1999; 84: 3666–3672. <https://doi.org/10.1210/jcem.84.10.6079> PMID: 10523012
25. Glass AR, Swerdloff RS, Bray GA, Dahms WT, Atkinson RL Low serum testosterone and sex-hormone-binding-globulin in massively obese men. *J Clin Endocrinol Metab.* 1977; 45: 1211–1219. <https://doi.org/10.1210/jcem-45-6-1211> PMID: 338622
26. Guzick DS, Wing R, Smith D, Berga SL, Winters SJ Endocrine consequences of weight loss in obese, hyperandrogenic, anovulatory women. *Fertil Steril.* 1994; 61: 598–604. PMID: 8150098
27. Aydin B, Winters SJ Sex Hormone-Binding Globulin in Children and Adolescents. *J Clin Res Pediatr Endocrinol.* 2016; 8: 1–12. <https://doi.org/10.4274/jcrpe.2764> PMID: 26761949
28. Wang Q, Kangas AJ, Soininen P, Tiainen M, Tynkkyinen T, Puukka K, et al. Sex hormone-binding globulin associations with circulating lipids and metabolites and the risk for type 2 diabetes: observational and causal effect estimates. *Int J Epidemiol.* 2015; 44: 623–637. <https://doi.org/10.1093/ije/dyv093> PMID: 26050255
29. Canoy D, Barber TM, Pouta A, Hartikainen AL, McCarthy MI, Franks S, et al. Serum sex hormone-binding globulin and testosterone in relation to cardiovascular disease risk factors in young men: a population-based study. *Eur J Endocrinol.* 2014; 170: 863–872. <https://doi.org/10.1530/EJE-13-1046> PMID: 24670886
30. Firtser S, Juonala M, Magnussen CG, Jula A, Loo BM, Marniemi J, et al. Relation of total and free testosterone and sex hormone-binding globulin with cardiovascular risk factors in men aged 24–45 years. The Cardiovascular Risk in Young Finns Study. *Atherosclerosis.* 2012; 222: 257–262. <https://doi.org/10.1016/j.atherosclerosis.2012.02.020> PMID: 22420889
31. Vanbillemont G, Lapauw B, De Naeyer H, Roef G, Kaufman JM, Taes YE Sex hormone-binding globulin at the crossroad of body composition, somatotrophic axis and insulin/glucose homeostasis in young healthy men. *Clin Endocrinol (Oxf).* 2012; 76: 111–118.
32. Cussons AJ, Stuckey BG, Watts GF Cardiovascular disease in the polycystic ovary syndrome: new insights and perspectives. *Atherosclerosis.* 2006; 185: 227–239. <https://doi.org/10.1016/j.atherosclerosis.2005.10.007> PMID: 16313910
33. Bartha JL, Comino-Delgado R, Romero-Carmona R, Gomez-Jaen MC Sex hormone-binding globulin in gestational diabetes. *Acta Obstet Gynecol Scand.* 2000; 79: 839–845. PMID: 11304966
34. Kopp HP, Festa A, Krugluger W, Schernthaner G Low levels of Sex-Hormone-Binding Globulin predict insulin requirement in patients with gestational diabetes mellitus. *Exp Clin Endocrinol Diabetes.* 2001; 109: 365–369. <https://doi.org/10.1055/s-2001-17408> PMID: 11573147

35. Thadhani R, Wolf M, Hsu-Blatman K, Sandler L, Nathan D, Ecker JL First-trimester sex hormone binding globulin and subsequent gestational diabetes mellitus. *Am J Obstet Gynecol*. 2003; 189: 171–176. PMID: [12861158](https://pubmed.ncbi.nlm.nih.gov/12861158/)
36. Jin Z, Guan X, Gao H, Shang L, Gao M, Su D, et al. The change in sex hormone binding globulin and the influence by gestational diabetes mellitus in fetal period. *Gynecol Endocrinol*. 2009; 25: 647–652. <https://doi.org/10.1080/09513590903015437> PMID: [19557594](https://pubmed.ncbi.nlm.nih.gov/19557594/)
37. Veltman-Verhulst SM, van Haeften TW, Eijkemans MJ, de Valk HW, Fauser BC, Goverde AJ Sex hormone-binding globulin concentrations before conception as a predictor for gestational diabetes in women with polycystic ovary syndrome. *Hum Reprod*. 2010; 25: 3123–3128. <https://doi.org/10.1093/humrep/deq272> PMID: [20943702](https://pubmed.ncbi.nlm.nih.gov/20943702/)
38. Hedderson MM, Xu F, Darbinian JA, Quesenberry CP, Sridhar S, Kim C, et al. Prepregnancy SHBG concentrations and risk for subsequently developing gestational diabetes mellitus. *Diabetes Care*. 2014; 37: 1296–1303. <https://doi.org/10.2337/dc13-1965> PMID: [24561392](https://pubmed.ncbi.nlm.nih.gov/24561392/)
39. Calderon-Margalit R, Schwartz SM, Wellons MF, Lewis CE, Daviglius ML, Schreiner PJ, et al. Prospective association of serum androgens and sex hormone-binding globulin with subclinical cardiovascular disease in young adult women: the "Coronary Artery Risk Development in Young Adults" women's study. *J Clin Endocrinol Metab*. 2010; 95: 4424–4431. <https://doi.org/10.1210/jc.2009-2643> PMID: [20554712](https://pubmed.ncbi.nlm.nih.gov/20554712/)
40. Rodriguez-Cuenca S, Gianotti M, Roca P, Proenza AM Sex steroid receptor expression in different adipose depots is modified during midpregnancy. *Mol Cell Endocrinol*. 2006; 249: 58–63. <https://doi.org/10.1016/j.mce.2006.01.005> PMID: [16504376](https://pubmed.ncbi.nlm.nih.gov/16504376/)
41. Clegg D, Hevener AL, Moreau KL, Morselli E, Criollo A, Van Pelt RE, et al. Sex Hormones and Cardio-metabolic Health: Role of Estrogen and Estrogen Receptors. *Endocrinology*. 2017; 158: 1095–1105. <https://doi.org/10.1210/en.2016-1677> PMID: [28323912](https://pubmed.ncbi.nlm.nih.gov/28323912/)
42. Sendemir A, Sendemir E, Kosmehl H, Jirikowski GF Expression of sex hormone-binding globulin, oxytocin receptor, caveolin-1 and p21 in leiomyoma. *Gynecol Endocrinol*. 2008; 24: 105–112. <https://doi.org/10.1080/09513590701690274> PMID: [17952758](https://pubmed.ncbi.nlm.nih.gov/17952758/)
43. Alevizaki M, Saltiki K, Xita N, Cimponeriu A, Stamatelopoulos K, Mantzou E, et al. The importance of the (TAAAA)n alleles at the SHBG gene promoter for the severity of coronary artery disease in post-menopausal women. *Menopause*. 2008; 15: 461–468. <https://doi.org/10.1097/gme.0b013e31814faf41> PMID: [18188141](https://pubmed.ncbi.nlm.nih.gov/18188141/)
44. Kahn SM, Hryb DJ, Nakhla AM, Romas NA, Rosner W Sex hormone-binding globulin is synthesized in target cells. *J Endocrinol*. 2002; 175: 113–120. PMID: [12379495](https://pubmed.ncbi.nlm.nih.gov/12379495/)
45. Elmlinger MW, Kuhnel W, Ranke MB Reference ranges for serum concentrations of lutropin (LH), follitropin (FSH), estradiol (E2), prolactin, progesterone, sex hormone-binding globulin (SHBG), dehydroepiandrosterone sulfate (DHEAS), cortisol and ferritin in neonates, children and young adults. *Clin Chem Lab Med*. 2002; 40: 1151–1160. <https://doi.org/10.1515/CCLM.2002.202> PMID: [12521235](https://pubmed.ncbi.nlm.nih.gov/12521235/)
46. Ibanez L, Lopez-Bermejo A, Diaz M, de Zegher F Catch-up growth in girls born small for gestational age precedes childhood progression to high adiposity. *Fertil Steril*. 2011; 96: 220–223. <https://doi.org/10.1016/j.fertnstert.2011.03.107> PMID: [21549368](https://pubmed.ncbi.nlm.nih.gov/21549368/)
47. Galloway PJ, Donaldson MD, Wallace AM Sex hormone binding globulin concentration as a prepubertal marker for hyperinsulinaemia in obesity. *Arch Dis Child*. 2001; 85: 489–491. <https://doi.org/10.1136/adc.85.6.489> PMID: [11719335](https://pubmed.ncbi.nlm.nih.gov/11719335/)
